# Supplementary material for: Damage to medical complexes in the Gaza Strip during the Israel–Hamas war: a geospatial analysis
Source: PubMed Central journal article supplement — BMJ Glob Health. 2024 Apr 5;9(4):e014768. doi: 10.1136/bmjgh-2023-014768 (PMC11002345; doi:10.1136/bmjgh-2023-014768), 2024-04-05
Supplement: bmjgh-2023-014768supp001.pdf [file bmjgh-2023-014768supp001.pdf]

## APPENDIX

### Sensitivity analyses

Welch's t-test was conducted as a sensitivity test of the relationship in the proportion of damage and damage severity between medical complexes and non-medical buildings, accounting for unknown variance and unequal sample sizes, using the following equation:

$$t = \frac{m_{non-medical} - m_{medical}}{\sqrt{\frac{S_{non-medical}^2}{n_{non-medical}} + \frac{S_{medical}^2}{n_{medical}}}}$$

where  $m$  is the mean,  $s$  is the standard deviation, and  $n$  is the number of observations. A significance level of 0.05 was used. The proportions of damage and damage severity were not statistically different between medical complexes and other buildings ( $p > 0.7292$  and  $p > 0.5548$ , respectively).
